# Supplementary material for: Dual antioxidant activity and the related mechanisms of a novel pentapeptide GLP4 from the fermented mycelia ofGanoderma lingzhi
Source: Royal Society of Chemistry journal article supplement (doi:10.1039/d2fo01572b), 2022-01-01
Supplement: d2fo01572b1.pdf [file d2fo01572b1.pdf]

## Supplementary Data

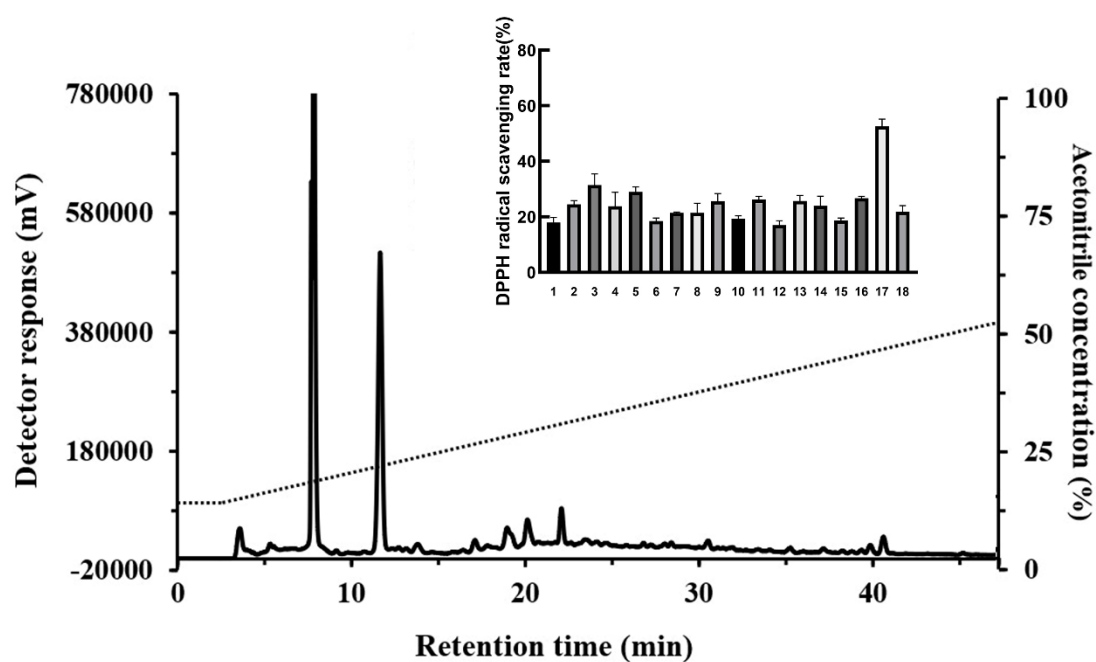

Fig. S1. RP-HPLC chromatograms of crude extracts (< 3 KDa) of fermented mycelium of *Ganoderma lingzhi* and the scavenging rate of DPPH radicals from different fractions.

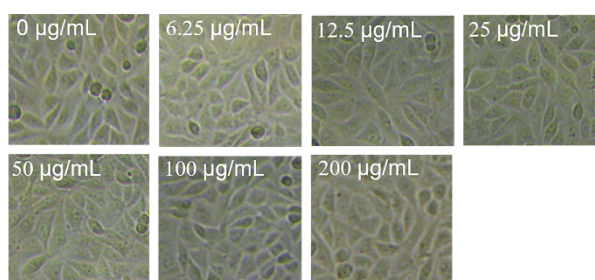

Fig. S2. Effect of GLP4 on the growth morphology of HUVECs. HUVECs were treated with different concentrations of GLP4 (0, 6.25, 12.5, 25, 50, 100, 200 µg/mL) for 24 h, and photographed by microscopy.

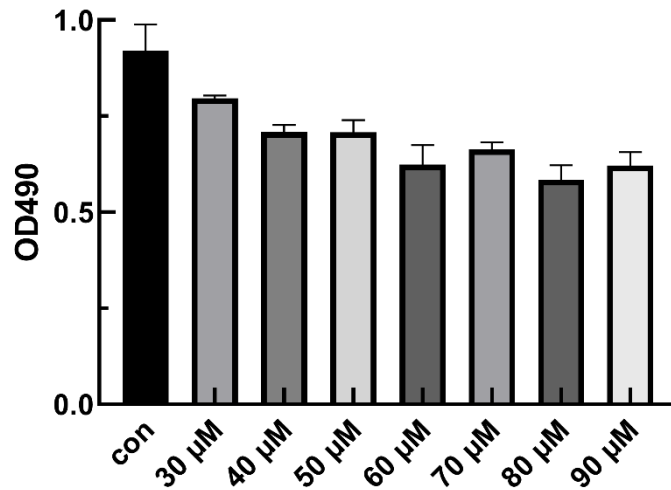

Fig. S3. Effects of different concentrations of H<sub>2</sub>O<sub>2</sub> on HUVECs. HUVECs were treated with different concentrations of H<sub>2</sub>O<sub>2</sub> (0, 30, 40, 50, 60, 70, 80, 90 μM) for 24 h, and cell viability was determined by the MTS assay.

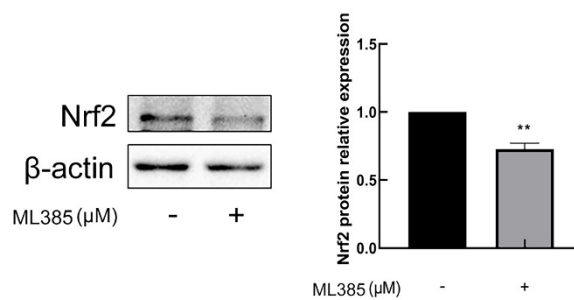

Fig. S4. The effect of Nrf2 inhibitor ML385 on Nrf2 protein expression level. HUVECs were added Nrf2 inhibitor ML385 and Nrf2 protein expression was tested by Western blotting in HUVECs. \*\* (p<0.01).

Table S1 HOMO and LUMO of QLVP and QLDL

| Peptide | HOMO                                                                                             | LUMO                                                                                              | $\Delta E$ |
|---------|--------------------------------------------------------------------------------------------------|---------------------------------------------------------------------------------------------------|------------|
| QLVP    | 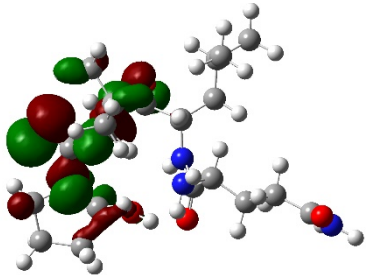<br>-6.5941 eV  | <br>-0.5684 eV  | 6.0257 eV  |
| QLDL    | <br>-6.6371 eV | <br>-0.4577 eV | 6.1794 eV  |

Table S2 Some of possible target proteins captured by GLP4 using LC-MS/MS

| Uniprot ID | Protein name                                                                                            | Abbreviation |
|------------|---------------------------------------------------------------------------------------------------------|--------------|
| P22234     | Multifunctional protein ADE2 OS=Homo sapiens OX=9606<br>GN=PAICS PE=1 SV=3                              | PUR6         |
| P53396     | ATP-citrate synthase OS=Homo sapiens OX=9606<br>GN=ACLY PE=1 SV=3                                       | ACLY         |
| Q92945     | Far upstream element-binding protein 2 OS=Homo sapiens<br>OX=9606 GN=KHSRP PE=1 SV=4                    | FUBP2        |
| P42285     | Exosome RNA helicase MTR4 OS=Homo sapiens OX=9606<br>GN=MTREX PE=1 SV=3                                 | MTREX        |
| Q8NHW5     | 60S acidic ribosomal protein P0-like OS=Homo sapiens<br>OX=9606 GN=RPLP0P6 PE=5 SV=1                    | RLA0L        |
| Q13263     | Transcription intermediary factor 1-beta OS=Homo sapiens<br>OX=9606 GN=TRIM28 PE=1 SV=5                 | TIF1B        |
| Q96HS1     | Serine/threonine-protein phosphatase PGAM5, mitochondrial<br>OS=Homo sapiens OX=9606 GN=PGAM5 PE=1 SV=2 | PGAM5        |
| P51114     | Fragile X mental retardation syndrome-related protein 1<br>OS=Homo sapiens OX=9606 GN=FXR1 PE=1 SV=3    | FXR1         |
| Q9P0W8     | Spermatogenesis-associated protein 7 OS=Homo sapiens<br>OX=9606 GN=SPATA7 PE=1 SV=3                     | SPAT7        |
| Q9NR30     | Nucleolar RNA helicase 2 OS=Homo sapiens OX=9606<br>GN=DDX21 PE=1 SV=5                                  | DDX21        |
| UBP10      | Ubiquitin carboxyl-terminal hydrolase 10 OS=Homo sapiens<br>OX=9606 GN=USP10 PE=1 SV=2                  | UBP10        |
| Q86YR5     | G-protein-signaling modulator 1 OS=Homo sapiens OX=9606<br>GN=GPSM1 PE=1 SV=2                           | GPSM1        |
| Q92614     | Unconventional myosin-XVIIIa OS=Homo sapiens OX=9606<br>GN=MYO18A PE=1 SV=3                             | MY18A        |
| P15559     | NAD(P)H dehydrogenase [quinone] 1 OS=Homo sapiens<br>OX=9606 GN=NQO1 PE=1 SV=1                          | NQO1         |
| P22102     | Trifunctional purine biosynthetic protein adenosine-3<br>OS=Homo sapiens OX=9606 GN=GART PE=1 SV=1      | PUR2         |
| O43524     | Forkhead box protein O3 OS=Homo sapiens OX=9606<br>GN=FOXO3 PE=1 SV=1                                   | FOXO3        |
| P21802     | Fibroblast growth factor receptor 2 OS=Homo sapiens<br>OX=9606 GN=FGFR2 PE=1 SV=1                       | FGFR2        |
| Q14444     | Caprin-1 OS=Homo sapiens OX=9606 GN=CAPRIN1 PE=1<br>SV=2                                                | CAPR1        |
| Q9H0C2     | ADP/ATP translocase 4 OS=Homo sapiens OX=9606<br>GN=SLC25A31 PE=1 SV=1                                  | ADT4         |
